# Supplementary material
Source: Springer Nature journal article supplement (https://www.springermedizin.de/resource/supplementary/12888_2007_227_MOESM1_ESM.pdf/9482232)
Supplement: MOESM1 [file 9482232]

Additional file 1: Trials of atypical antipsychotics in depression - design, details, and outcomes

| Reference [number]         | Patients                                                                                                                                                                                                                     | Treatment                                                                                                                                                                                     | Mean daily dose<br>Other medication                                                                       | Duration (weeks) | QS         | Response                                                                                                                                         | Remission                                                                                                                       | CGI                                                                                                                                                          | Emergence of mania                                                                                                           | Discontinuations                        |                                       |                                        |                                      | Adverse event reporting                 |                                                                                                                                |                                                 | Scale-defined adverse events                                                                  |             |
|----------------------------|------------------------------------------------------------------------------------------------------------------------------------------------------------------------------------------------------------------------------|-----------------------------------------------------------------------------------------------------------------------------------------------------------------------------------------------|-----------------------------------------------------------------------------------------------------------|------------------|------------|--------------------------------------------------------------------------------------------------------------------------------------------------|---------------------------------------------------------------------------------------------------------------------------------|--------------------------------------------------------------------------------------------------------------------------------------------------------------|------------------------------------------------------------------------------------------------------------------------------|-----------------------------------------|---------------------------------------|----------------------------------------|--------------------------------------|-----------------------------------------|--------------------------------------------------------------------------------------------------------------------------------|-------------------------------------------------|-----------------------------------------------------------------------------------------------|-------------|
|                            |                                                                                                                                                                                                                              |                                                                                                                                                                                               |                                                                                                           |                  |            |                                                                                                                                                  |                                                                                                                                 |                                                                                                                                                              |                                                                                                                              | All cause                               | Lack of efficacy                      | Adverse event                          | T-E mania                            | Patients experiencing any adverse event | Severe                                                                                                                         | Serious                                         | Treatment related                                                                             | EP symptoms |
| Tohen et al. 2003 [18]     | Bipolar I depression, (MADRS >19)<br>Age:42 ±12 years<br>M:47%<br>Psychotic: 12.5%<br>Rapid cycling: 37%                                                                                                                     | (1) olanzapine 5-20 mg/day, n=351<br>(2) olanzapine-fluoxetine 6/25, 6/50 or 12/50 mg/day, n=82<br>(3) placebo, n=355                                                                         | (1) 9.7 mg<br>(2) 7.4 mg/39.4 mg<br>Benzodiazepines (36-44%)<br>Anticholinergics to treat EP sympt (3-8%) | 8                | R2, D1, W1 | ≥50% improvement in MADRS, min 4 wks<br>(1) 137/351<br>(2) 46/82<br>(3) 108/355<br>Median time to response (days):<br>(1) 57<br>(2) 42<br>(3) 59 | MADRS ≤12, min 4 wks<br>(1) 115/351<br>(2) 40/82<br>(3) 87/355<br>Median time to remission(days):<br>(1) 57<br>(2) 42<br>(3) 59 | no categorical data<br>Mean improvements sig greater for (2) than (1) than (3)                                                                               | YMRS <15 at baseline and ≥15 any time thereafter<br>(1) 19/335<br>(2) 5/78<br>(3) 23/345                                     | (1) 191/351<br>(2) 31/82<br>(3) 232/355 | (1) 73/351<br>(2) 8/82<br>(3) 121/355 | (1) 34/351<br>(2) 2/82<br>(3) 19/355   | (1) 15/351<br>(2) 4/82<br>(3) 24/355 | no data                                 | no data                                                                                                                        | no data                                         | SAS and AIMS<br>No sig diff                                                                   |             |
| Shelton, Stahl. 2004 [19]  | Bipolar I and II disorder, depressive episode (HAM-D>17), receiving mood stabiliser<br>Age:36 ±10 years<br>M:50%<br>Psychotic: 0%                                                                                            | (1) risperidone 1-4 mg/day + placebo plus mood stabiliser, n=10<br>(2) paroxetine 20-40 mg/day + placebo plus mood stabiliser, n=10<br>(3) risperidone +paroxetine plus mood stabiliser, n=10 | (1) 2.15 mg<br>(2) 35 mg<br>(3) 1.16 mg/22 mg<br>Lorazepam in first 4 weeks                               | 12               | R1, D2, W1 | ≥50% improvement on HAM-D and 1 or 2 on CGI-S (LOCF)<br>(1) 3/10<br>(2) 2/10<br>(3) 3/10                                                         | HAM-D ≤7 and no longer MDD on DSM-IV (LOCF)<br>(1) 3/10<br>(2) 2/10<br>(3) 3/10                                                 | no categorical data<br>none (one pt in (2) experienced v mild hypomania)                                                                                     | (1) 5/10<br>(2) 2/10<br>(3) 4/10                                                                                             | (1) 3/10<br>(2) 0/10<br>(3) 1/10        | (1) 1/10<br>(2) 1/10<br>(3) 3/10      | none                                   | no data                              | no data                                 | no data                                                                                                                        | SAS, BARS<br>No sig diff                        |                                                                                               |             |
| Calabrese et al. 2005 [20] | Bipolar I and II disorder, major depressive episode (HAM-D≥20, YMRS≤12)<br>Age:37 ±11 years<br>M:42%<br>Excl: history non-response to >2 classes antidepressants for current episode                                         | (1) quetiapine 600 mg/day, n=170<br>(2) quetiapine 300 mg/day, n=172<br>(3) placebo, n=169 [ITT cohort]                                                                                       | N/A<br>Lorazepam and zolpidem during first 3 weeks - generally <10%                                       | 8                | R2, D2, W1 | ≥50% improvement in MADRS<br>(1) 99/170<br>(2) 99/172<br>(3) 61/169<br>Median time to response(days):<br>(1) 22<br>(2) 22<br>(3) 36              | MADRS ≤12 in MADRS<br>(1) 90/170<br>(2) 91/172<br>(3) 48/169<br>Median time to remission (days):<br>(1) 27<br>(2) 29<br>(3) 65  | normal/not at all ill/borderline ill<br>(1) 72/170<br>(2) 66/172<br>(3) 40/169                                                                               | YMRS ≥16 on 2 consec visits or at end point or AE of mania (using safety population)<br>(1) 7/179<br>(2) 7/180<br>(3) 7/180  | (1) 82/180<br>(2) 60/181<br>(3) 74/181  | (1) 1/180<br>(2) 4/181<br>(3) 24/181  | (1) 47/180<br>(2) 29/181<br>(3) 15/181 | no data                              | no data                                 | no data                                                                                                                        | (1) 9/180<br>(2) 6/181<br>(3) 16/181 (none T-R) | SAS, BARS: 9% to 15% with an inc from baseline, with no sig diff between groups               |             |
| Brown et al. 2006 [21]     | Bipolar I disorder, depressive episode, (MADRS >19)<br>Age:37 ±11 years<br>M:40%<br>Psychotic: 6%<br>Rapid cycling: 34%<br>Excl: YMRS≥15, history non-response to study drugs                                                | (1) olanzapine-fluoxetine 6/25, 12/25, 6/50 or 12/50 mg/day, n=205<br>(2) Lamotrigine 150-200 mg/day, n=205                                                                                   | (1) 10.7/38.3 mg<br>(2) 106.4 mg<br>Benzodiazepines (22%)<br>Anticholinergics (1%)                        | 7                | R1, D1, W1 | ≥50% improvement in MADRS<br>(1) 141/205<br>(2) 122/205<br>Median time to response(days):<br>(1) 17<br>(2) 23                                    | MADRS ≤12, at last observation<br>(1) 116/205<br>(2) 101/205<br>Median time to remission(days):<br>(1) 32<br>(2) 41             | CGI-S ≤3<br>(1) 147/205<br>(2) 132/205<br>Mean improvement sig greater for (1) than (2)                                                                      | YMRS>15 at any time<br>(1) 8/205<br>(2) 11/205                                                                               | (1) 68/205<br>(2) 71/205                | (1) 2/205<br>(2) 4/205                | (1) 17/205<br>(2) 15/205               | no data                              | no data                                 | incomplete data<br>Suicide attempts:<br>(1) 1/205<br>(2) 2/205<br>All suicidal and self harm events:<br>(1) 1/205<br>(2) 7/205 | no data                                         | AIMS: no sig diff between groups in severity of tardive dyskinesia<br>(1) 48/205<br>(2) 0/205 |             |
| Thase et al. 2006 [22]     | Bipolar I and II disorder, major depressive episode (HAM-D≥20, YMRS≤12)<br>Age:37 ±11 years<br>M:43%<br>Excl: history non-response to >2 classes antidepressants for current episode. Current episode <4 weeks or >12 months | (1) quetiapine 600 mg/day, n=151<br>(2) quetiapine 300 mg/day, n=155<br>(3) placebo, n=161 [ITT cohort]                                                                                       | N/A<br>Lorazepam and zolpidem during first 3 weeks - generally low, <4%                                   | 8                | R1, D2, W1 | ≥50% improvement in MADRS<br>(1) 88/151<br>(2) 93/155<br>(3) 71/161<br>Sig diff between (1) or (2) and (3) by week 2                             | MADRS ≤12<br>(1) 79/151<br>(2) 80/155<br>(3) 48/161<br>Sig diff between (2) and (3) by week 2, and for (1) and (3) by week 3    | normal/not at all ill/borderline ill<br>(1) 49/151<br>(2) 64/155<br>(3) 39/161<br>Much improved/very much improved<br>(1) 91/151<br>(2) 95/155<br>(3) 62/161 | YMRS ≥16 on 2 consec visits or at end point or AE of mania (using safety population)<br>(1) 6/168<br>(2) 3/171<br>(3) 11/167 | (1) 79/169<br>(2) 71/172<br>(3) 58/168  | (1) 5/169<br>(2) 3/172<br>(3) 13/168  | (1) 19/169<br>(2) 14/172<br>(3) 2/168  | no data                              | no data                                 | no data                                                                                                                        | (1) 7/169<br>(2) 3/172<br>(3) 1/168 (none T-R)  | SAS, BARS<br>No sig change from baseline in any group<br>(1) 11/168<br>(2) 5/171<br>(3) 4/167 |             |

QS = quality score; R = randomised; D = double blind; W = withdrawals or drop outs; CGI = clinical global impression; TE = treatment emergent; EP = extrapyramidal; AIMS = abnormal involuntary movement scale; SAS = Simpson-Angus rating scale; BARS = Barnes akathisia rating scale
